# Supplementary material for: Molecular characterization and expression analysis of CSαβ defensin genes from the scorpion Mesobuthus martensii
Source: PubMed Central journal article supplement (PMC6435467; doi:10.1042/bsr20171282), 2017-12-15

## Supplementary information

### Molecular characterization and expression analysis of CSc $\beta$ defensin genes from the scorpion *Mesobuthus martensii*

Yange Lang<sup>a</sup>, Xiaohuan Pi<sup>b</sup>, Zhiyong Di<sup>a,c</sup>, Qian Zhang<sup>a</sup>, Huijuan Wang<sup>a</sup>, Bingzheng Shen<sup>a,d</sup>, Fangfang Li<sup>a</sup>, Gaomin Liu<sup>a</sup>, Yao Yu<sup>e</sup>, Xuan Li<sup>e</sup>, Yingliang Wu<sup>a</sup>, Wenxin Li<sup>a</sup>, Zhijian Cao<sup>a,\*</sup>

<sup>a</sup>State Key Laboratory of Virology, College of Life Sciences, Wuhan University, Wuhan 430072, China

<sup>b</sup>College of Basic Medicine, Lanzhou University, Lanzhou 730000, China

<sup>c</sup>College of Life Sciences, University of Science and Technology of China, Hefei 230022, China

<sup>d</sup>Department of Pharmacy, Renmin Hospital, Wuhan University, Hubei, 430060, China

<sup>e</sup>Key Laboratory of Synthetic Biology, Institute of Plant Physiology and Ecology, Shanghai Institutes for Biological Sciences, Chinese Academy of Sciences, Shanghai 200031, China

\*Author to whom correspondence should be addressed. E-mail: zjcao@whu.edu.cn. Tel: ++86-27-68752831. Fax: ++86-27-68756746.

## Supplementary tables

**Table S1. PCR primers for the validation of potential defensin genes**

| Primer names | Sequences                       |
|--------------|---------------------------------|
|              | Forward primers                 |
| BmKDfsin1-FP | 5'-TGCAGATAAATTATGCTG-3'        |
| BmKDfsin2-FP | 5'-TTTTTGACAATACAGTTGACTCCTA-3' |
| BmKDfsin3-FP | 5'-GGCTCGCCCATTGAACCCATAAACC-3' |
| BmKDfsin4-FP | 5'-ATCCGGGTCCCACACATCCAGATTT-3' |
| BmKDfsin5-FP | 5'-ATACTACGTCCGTGTCCG-3'        |
| BmKDfsin6-FP | 5'-TGAAATCAGTTTTGCAGAATTGCCA-3' |
|              | Reverse primers                 |
| BmKDfsin1-RP | 5'-TTCTAGCAATGATGAAGT-3'        |
| BmKDfsin2-RP | 5'-CGAAGAGACAGGGAAAGGAAAGACT-3' |
| BmKDfsin3-RP | 5'-ATGTCCAGATCAAATGGTTCCGTC-3'  |
| BmKDfsin4-RP | 5'-ATGAAACCACCACATGAGCCGAAAG-3' |
| BmKDfsin5-RP | 5'-GGCAATCATTGCAGTCAA-3'        |
| BmKDfsin6-RP | 5'-AGATGTGCGGTAAAACCACCTAAAG-3' |

**Table S2. Amino acid sequence information of defensins used in Figure 3 and Figure 7**

| Names                                      | Sequences                                             |
|--------------------------------------------|-------------------------------------------------------|
| <i>Homo_sapiens_1</i>                      | VSLAWDESLAPKHPGSRKNMACYCRIPACIAGERRYGTCIYQGRLWAFCC    |
| <i>Homo_sapiens_3</i>                      | VSLAWDESLAPKHPGSRKNMDYCRIPACIAGERRYGTCIYQGRLWAFCC     |
| <i>Homo_sapiens_4</i>                      | ISFAWDKSSALQVSGSTRGMVCSCLRVFCRRTELRVGNCLIGGVSFTYCC    |
| <i>Macaca_mulatta</i>                      | VSLAWDESLAPKDSVPGLRKNMACYCRIPACLAGERRYGTCFYLGRLVWAFCC |
| <i>Oryctolagus_cuniculus</i>               | IYVKEHESSALEALGVKAGVVCACRRALCLPRERRAGFCRIRGRIHPLCC    |
| <i>Rattus_norvegicus_1</i>                 | ISFGGDKGTALQDADVKAGVTCYCRSTRCGFRERLSGACGYRGRIYRLCC    |
| <i>Mus_musculus</i>                        | VSFQDPEGTSLQEESLRDLVYCRSRGCKGRERMNGTCRKGHLLYTLCC      |
| <i>Cavia_porcellus</i>                     | ISFWEEESTSLEDAGAGARRCICCTTRTCRFPYRRLGTCTFQNRVYTFCC    |
| <i>Homo_sapiens_HBD2</i>                   | CLKSGAICHPVFCPRRYKQIGTCGLPGTKCC                       |
| <i>Homo_sapiens_HBD3</i>                   | YYCRVRGGRCVLSCLPKKEEQIGKCSTRGRKCC                     |
| <i>Bos_taurus</i>                          | CRWNMGVCIPISCPGNMRQIGTCFGPRVPCC                       |
| <i>Bubalus_bubalis</i>                     | CRRNRGFCCLAFWCPGSMRQIGTCFGFPVKCC                      |
| <i>Capra_hircus</i>                        | CHRIKGVCAPDRCPNMRQIGTCFGPPVKCC                        |
| <i>Rattus_norvegicus_2</i>                 | CLTKGGVCWGPCTGGFRQIGTCGLPRVRCC                        |
| <i>Meleagris_gallopavo</i>                 | CRIRGGFCRFGSCRPHIAIAKCATFIPCC                         |
| <i>Gallus_gallus</i>                       | MQCGYRGTFCTPGKCPYGNAYLGLCRPKYSCC                      |
| <i>Paralichthys_olivaceus</i>              | LDCASTIQGVCKDSCLESTEFSIGALGCSAESSTVCC                 |
| <i>Takifugu_rubripes</i>                   | WTCPSLSGVCRKVCCLPTEMFPGPLGCGKGFQCC                    |
| <i>Tetraodon_nigroviridis</i>              | WACPSLNGVCRKVCCLPTELFPGPLGCGKGFLLCC                   |
| <i>Oncorhynchus_mykiss</i>                 | FSCTLSGVCRKLCCLPTEMFPGPLGCGKGFLLCC                    |
| <i>Panulirus_japonicus_1</i>               | NDCGSNGGSCTRGYCSYSNRLPYTCSLGRTCC                      |
| <i>Panulirus_japonicus_2</i>               | LD CRTNGGRCVTGYCSNTLPYSCGGGAICC                       |
| <i>Branchiostoma_floridae</i>              | HSCANNRGWCRSSCFSHEYIDYNSAVCGRYRCC                     |
| <i>Branchiostoma_belcheri_tsingtauense</i> | HSCANNRGWCRSRCSHEYIDSWHSDVCGSYDCC                     |
| <i>Argopecten_irradians</i>                | HSCYGNRGWCRSSCRSYEREYRGGNLGVCGSYKCC                   |
| <i>Ruditapes_philippinarum</i>             | RRCLSGRGFCRAICSFEEFVRGNIDCYFGYNCC                     |
| <i>Crassostrea_gigasbig_1</i>              | HSCANNRGWCRPTCFSHEYTDWFNNDVCGSYRCC                    |
| <i>Crassostrea_gigasbig_2</i>              | HSCANNRGWCRPTCYSYEYTDWFNNDVCGSYRCC                    |
| <i>Crassostrea_gigasbig_3</i>              | HSCANNRGWCRESFCFSHEYTDWANTFGVCGSYFCC                  |
| <i>Tachypleus_tridentatus</i>              | HSCAGNRGWCRSKCFRHEYVDYYSAVCGRYFCC                     |
| <i>Mesobuthus_eupeus</i>                   | KYCSSEDPLECNHCCKTKNQIGVCHGANGKEKCS                    |
| <i>Centruroides_limpidus</i>               | GACQFWSCNSSCISRGYRQGYCWGIQYKYCQC                      |

**Table S2. Amino acid sequence information of defensins used in Figure 3 and Figure 7 (continued)**

| Names                              | Sequences                                                  |
|------------------------------------|------------------------------------------------------------|
| <i>Androctonus australis</i>       | FGCPFNQGA <b>CHRH</b> CRSIRRRGGY <b>CAGLFKQTCTC</b>        |
| <i>Leiurus quinquestriatus</i>     | FGCPLNQGA <b>CHRH</b> CRSIRRRGGY <b>CAGFFKQTCTC</b>        |
| <i>Mesobuthus martensii_2</i>      | YGCPVNEK <b>IQEH</b> CRSIGRSGGN <b>CTGFRRKDCVC</b>         |
| <i>Mesobuthus martensii_3</i>      | FGCPFNQGK <b>CHRH</b> CRSIRRRGGY <b>CDGFLKQRCVC</b>        |
| <i>Mesobuthus martensii_4</i>      | FGCPFNQGG <b>CHKH</b> CQSIRRRGGY <b>CDGFLKTRCVC</b>        |
| <i>Mesobuthus martensii_6</i>      | FGCPLFQFA <b>CDSH</b> CRGMGRKGGY <b>CGGNFKLTCIC</b>        |
| <i>Tityus discrepans</i>           | RYCPRNPEA <b>CYNY</b> CLRTGRPGGY <b>CGGRSRITCFC</b>        |
| <i>Dermacentor variabilis</i>      | FGCPLNQGA <b>CHNH</b> CRSIRRRGGY <b>CSGIIKQTCTC</b>        |
| <i>Mytilus galloprovincialis_1</i> | FGCPNNY <b>QCHRH</b> CKSIPGR <b>CGGYCGGWHRLRCTC</b>        |
| <i>Mytilus galloprovincialis_2</i> | FGCPNNYA <b>CHQH</b> CKSIRGY <b>CGGYCASWFRLRCTC</b>        |
| <i>Mytilus edulis_A</i>            | FGCPNDYP <b>CHRH</b> CKSIPGRXGGY <b>CGGXHRLRCTC</b>        |
| <i>Mytilus edulis_B</i>            | FGCPNDYP <b>CHRH</b> CKSIPGRYGGY <b>CGGXHRLRCTC</b>        |
| <i>Crassostrea gigas_1</i>         | FGCPRDQYK <b>CNSH</b> CQSIGCRAGY <b>CDAVTLWLRCTC</b>       |
| <i>Crassostrea gigas_2</i>         | FGCPGDQYE <b>CNRH</b> CRSIGCRAGY <b>CDAVTLWLRCTC</b>       |
| <i>Crassostrea gigas_m</i>         | FGCPGNQLK <b>CNNH</b> CKSISCRAGY <b>CDAAATLWLRCTC</b>      |
| <i>Crassostrea virginica</i>       | FGCPWNR <b>YQCHSH</b> CRSIGRLGGY <b>CAGSLRLTCTC</b>        |
| <i>Haliotis discus discus</i>      | VTCDLLSLQIMGNSFGDSA <b>CAAH</b> CIGLHHSGGH <b>CSGGVCVC</b> |
| <i>Haliotis discus hannai</i>      | VTCDLLSFQIGGFSFGDSA <b>CAAH</b> CIVLHHNGGH <b>CSNGVCVC</b> |
| <i>Anopheles gambiae</i>           | ATCDLASGFGVGS <b>LCAAH</b> CIARRYRGGY <b>CNSKAVCVC</b>     |
| <i>Aedes aegypti</i>               | ATCDLLSGFGVGS <b>LCAAH</b> CIARRNRGGY <b>CNAKKVCVC</b>     |
| <i>Drosophila melanogaster</i>     | ATCDLLSKWNWNHTA <b>CAGH</b> CIAKGFKGGY <b>CNDKAVCVC</b>    |
| <i>Pseudoplectania nigrella</i>    | FGCNGPWDEDDMQ <b>CHNH</b> CKSIKGYKGGY <b>CAKGGFVCKC</b>    |

The six conserved cysteine residues which forms the disulfide bonds are highlighted with an orange color.

**Table S3. Real-time PCR primers for *M. martensii* defensin and actin genes**

| Primer names         | Sequences                    |
|----------------------|------------------------------|
| Forward primers      |                              |
| Q-BmKDfsin3-FP       | 5'-CACTCTTGAAATGGGAATGG-3'   |
| Q-BmKDfsin4-FP       | 5'-CTTGAAATGGGAATAGTGG-3'    |
| Q-BmKDfsin6-FP       | 5'-CTATGGAGATTACGATGG-3'     |
| Q- $\beta$ -actin-FP | 5'-GGTATAGTGACAAATTGGGATG-3' |
| Reverse primers      |                              |
| Q-BmKDfsin3-RP       | 5'-CATCGCAATATCCTCCTCTT-3'   |
| Q-BmKDfsin3-RP       | 5'-ATCGCAATATCCTCCTCTT-3'    |
| Q-BmKDfsin3-RP       | 5'-AATACCCTCCTTTTCGTC-3'     |
| Q- $\beta$ -actin-RP | 5'-TTGCCTTAGGATTCAGTGGG-3'   |

**Table S4. Primers for cloning the promoter regions of defensin genes**

| Primer names   | Sequences                       |
|----------------|---------------------------------|
|                | Forward primers                 |
| p-BmKDfsin3-FP | 5'-GCACACAAATGTAAGG-3'          |
| p-BmKDfsin4-FP | 5'-GCCCTTCGACAGGTTTC-3'         |
| p-BmKDfsin6-FP | 5'-GATTTGTTTTTGTAGTCTATGACAT-3' |
|                | Reverse primers                 |
| p-BmKDfsin3-RP | 5'-GCTTCCACCATTCCCATTTC-3'      |
| p-BmKDfsin4-RP | 5'-GCTTCCACTATTCCCATTCT-3'      |
| p-BmKDfsin6-RP | 5'-CGAATCCAGCTTCTACCATCG-3'     |

**Table S5. Primers for inserting the promoter regions of into pGL3-Basic vector**

| Primer names      | Sequences                           |
|-------------------|-------------------------------------|
|                   | Forward primers                     |
| pGL3-BmKDfsin3-FP | 5'-CGACGCGTGCACACAAATGTAAGG-3'      |
| pGL3-BmKDfsin4-FP | 5'-CGACGCGTGCCCTTCGACAGGTTT-3'      |
| pGL3-BmKDfsin6-FP | 5'-CGACGCGTGATTGTTTTTGTAGT-3'       |
|                   | Reverse primers                     |
| pGL3-BmKDfsin3-RP | 5'GAAGATCTGCTTCCACCATTCCCATTTC-3'   |
| pGL3-BmKDfsin4-RP | 5'-CCGAGATCTGCTTCCACTATTCCCATTTC-3' |
| pGL3-BmKDfsin6-RP | 5'-CCGCTCGAGCGAATCCAGCTTCTACCAT-3'  |

**Table S6. Six potential defensin genes characterized from the scorpion *M. martensii* genome**

| Scallfold ID                                                | E-value  | Score | Transcript                   | Name      |
|-------------------------------------------------------------|----------|-------|------------------------------|-----------|
| NODE_7320178_length_147024_cov_27.792116_9_split_1_split2   | 6.00E-18 | 78.2  | comp1050_c0_seq1<br>len=467  | BmKDfsin5 |
| NODE_7421102_length_247998_cov_28.593920_3_split_0_split2   | 7.00E-14 | 66.2  | comp92_c0_seq1<br>len=1607   | BmKDfsin3 |
| NODE_7421102_length_247998_cov_28.593920_2_split_9_split2   | 1.00E-12 | 63.2  | comp92_c0_seq5<br>len=232    | BmKDfsin4 |
| NODE_7796716_length_1260638_cov_29.621883_29_split_1_split2 | 6.00E-10 | 54.3  | comp14_c1_seq1<br>len=251    | BmKDfsin6 |
| NODE_4521545_length_29012_cov_18.969770_0_split             | 4.00E-07 | 47    | None                         | BmKDfsin1 |
| NODE_4521545_length_29012_cov_18.969770_1_split             | 5.00E-07 | 47    | comp12795_c0_seq4<br>len=146 | BmKDfsin2 |



## Supplementary figure legends

### **Fig S1. PCR validation of defensin genes from the scorpion *M. martensii***

The genomic DNA of the scorpion *M. martensii* was used as the PCR template. M, 1 Kb DNA Ladder. 1, BmKDfsin1. 2, BmKDfsin2. 3, BmKDfsin3. 4, BmKDfsin4. 5, BmKDfsin5. 6, BmKDfsin6.

### **Fig S2. PCR amplification of promoter regions of three defensin genes from the scorpion *M. martensii***

Three defensins (BmKDfsin3, BmKDfsin4 and BmKDfsin6) from the scorpion *M. martensii* were selected to clone their promoter regions. M, 1Kb DNA Ladder. 1, BmKDfsin3. 2, BmKDfsin4. 3, BmKDfsin6.

Fig S1

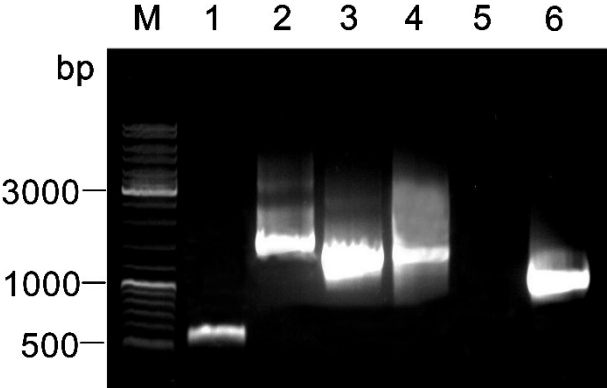

Fig S2

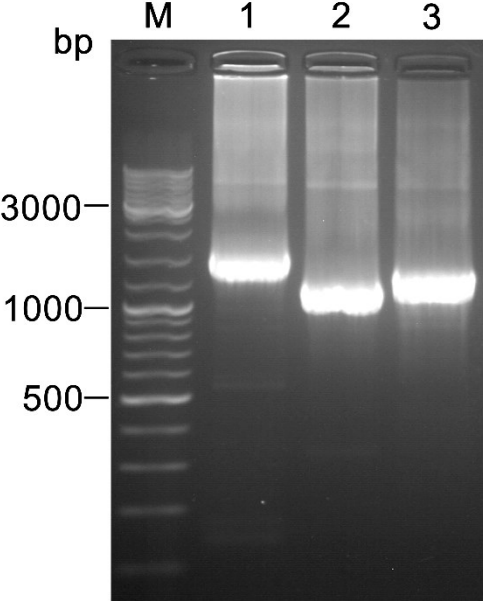

Supplement: bsr20171282_Supp1.pdf [file bsr20171282_Supp1.pdf]
